# Supplementary material
Source: PubMed Central journal article supplement (PMC4139360)
Supplement: NIHMS597204-supplement-01.pdf [file NIHMS597204-supplement-01.pdf]

## Appendix

**Supplementary Table I.** Number of events for recurrent CHD, all-cause mortality, or the pooled outcome of CHD events or all-cause mortality associated with each “very high-risk” condition analyzed separately and chronic kidney disease

|                      | No CKD                    |                              | CKD                       |                              |
|----------------------|---------------------------|------------------------------|---------------------------|------------------------------|
|                      | No DM<br>(n = 2001)       | DM<br>(n = 627)              | No DM<br>(n = 742)        | DM<br>(n = 568)              |
| Recurrent CHD events | 123                       | 54                           | 90                        | 85                           |
| All-cause mortality  | 207                       | 64                           | 168                       | 155                          |
| Pooled outcome*      | 272                       | 95                           | 213                       | 189                          |
|                      | No MetSyn<br>(n = 1419)   | MetSyn<br>(n = 1209)         | No MetSyn<br>(n = 530)    | MetSyn<br>(n = 780)          |
| Recurrent CHD events | 82                        | 95                           | 70                        | 105                          |
| All-cause mortality  | 148                       | 123                          | 129                       | 194                          |
| Pooled outcome*      | 188                       | 179                          | 168                       | 234                          |
|                      | Not smoking<br>(n = 2240) | Current smoking<br>(n = 388) | Not smoking<br>(n = 1094) | Current smoking<br>(n = 216) |
| Recurrent CHD events | 137                       | 40                           | 141                       | 34                           |
| All-cause mortality  | 208                       | 63                           | 263                       | 60                           |
| Pooled outcome*      | 281                       | 86                           | 323                       | 79                           |

\* Pooled outcome includes composite of recurrent CHD or all-cause mortality. Recurrent CHD events and all-cause mortality do not sum to the number of pooled outcome events as some participants had recurrent events and died.

**Supplementary Table II.** Crude incidence rates (95% CI) per 1,000 person-years of recurrent CHD events, all-cause mortality or the pooled outcome of CHD events or all-cause mortality associated with each “very high risk” condition analyzed separately and chronic kidney disease

|                      | No CKD                     |                              | CKD                        |                              |
|----------------------|----------------------------|------------------------------|----------------------------|------------------------------|
|                      | No DM<br>(n = 2,001)       | DM<br>(n = 627)              | No DM<br>(n = 742)         | DM<br>(n = 568)              |
| Recurrent CHD events | 14.6 (12.0-17.1)           | 20.3 (14.9-25.8)             | 30.7 (24.4-37.1)           | 39.5 (31.1-47.9)             |
| All-cause mortality  | 22.7 (19.6-25.8)           | 21.8 (16.4-27.1)             | 52.3 (44.4-60.2)           | 64.9 (54.7-75.1)             |
| Pooled outcome*      | 32.2 (28.4-36.0)           | 35.8 (28.6-43.0)             | 72.8 (63.0-82.5)           | 87.8 (75.2-100.3)            |
|                      | No CKD                     | CKD                          | No CKD                     | CKD                          |
|                      | No MetSyn<br>(n = 1,419)   | MetSyn<br>(n = 1,209)        | No MetSyn<br>(n = 530)     | MetSyn<br>(n = 780)          |
| Recurrent CHD events | 13.7 (10.7-16.7)           | 18.6 (14.8-22.3)             | 34.2 (26.2-42.2)           | 34.6 (28.0-41.2)             |
| All-cause mortality  | 23.0 (19.6-27.0)           | 21.9 (18.0-25.8)             | 57.4 (47.5-67.3)           | 57.9 (49.7-66.0)             |
| Pooled outcome*      | 31.4 (27.0-35.9)           | 35.0 (29.9-40.1)             | 82.1 (69.7-94.5)           | 77.1 (37.3-87.0)             |
|                      | No CKD                     | CKD                          | No CKD                     | CKD                          |
|                      | Not smoking<br>(n = 2,240) | Current smoking<br>(n = 388) | Not smoking<br>(n = 1,094) | Current smoking<br>(n = 216) |
| Recurrent CHD events | 14.3 (11.9-16.6)           | 26.8 (18.5-35.1)             | 32.6 (27.2-38.0)           | 45.2 (30.0-60.4)             |
| All-cause mortality  | 20.0 (17.3-22.8)           | 37.8 (28.5-47.2)             | 55.7 (48.9-62.4)           | 68.5 (51.2-85.9)             |
| Pooled outcome*      | 29.2 (25.8-32.7)           | 57.6 (45.4-69.7)             | 74.6 (66.5-82.8)           | 105.0 (81.8-128.1)           |

Numbers in table are incidence rate (95% confidence interval) per 1,000 person-years. CKD, chronic kidney disease.

\* Pooled outcome includes composite of recurrent CHD or all-cause mortality.

**Supplementary Table III.** Number of events and population at risk for secondary definitions of chronic kidney disease

|                                                          | Number at risk | Recurrent CHD events | All-cause mortality | Pooled Outcome* |
|----------------------------------------------------------|----------------|----------------------|---------------------|-----------------|
| eGFR <60 mL/min per 1.73 m <sup>2</sup>                  |                |                      |                     |                 |
| Not DM, MetSyn or smoking and no CKD                     | 1253           | 77 (6.1%)            | 129 (10.3%)         | 168 (13.4%)     |
| DM, MetSyn or smoking only                               | 1941           | 173 (8.9%)           | 261 (13.4%)         | 355 (18.3%)     |
| CKD only                                                 | 234            | 32 (13.7%)           | 52 (22.2%)          | 68 (29.1%)      |
| Both DM, MetSyn or smoking and CKD                       | 510            | 70 (13.7%)           | 152 (29.8%)         | 178 (34.9%)     |
| ACR ≥30 mg/g                                             |                |                      |                     |                 |
| Not DM, MetSyn or smoking and no CKD                     | 1280           | 78 (6.1%)            | 132 (10.3%)         | 170 (13.3%)     |
| DM, MetSyn or smoking only                               | 1793           | 150 (8.4%)           | 231 (12.9%)         | 311 (17.3%)     |
| CKD only                                                 | 207            | 31 (14.9%)           | 49 (23.7%)          | 66 (31.9%)      |
| Both DM, MetSyn or smoking and CKD                       | 658            | 93 (14.1%)           | 182 (27.7%)         | 222 (33.7%)     |
| eGFR <60 mL/min per 1.73 m <sup>2</sup> and ACR ≥30 mg/g |                |                      |                     |                 |
| Not DM, MetSyn or smoking and no CKD                     | 1416           | 97 (6.9%)            | 157 (11.1%)         | 207 (14.6%)     |
| DM, MetSyn or smoking only                               | 2223           | 204 (9.2%)           | 325 (14.6%)         | 403 (18.1%)     |
| CKD only                                                 | 71             | 12 (16.9%)           | 24 (33.8%)          | 29 (40.8%)      |
| Both DM, MetSyn or smoking and CKD                       | 228            | 39 (17.1%)           | 88 (38.6%)          | 103 (45.2%)     |
| eGFR <45 mL/min per 1.73 m <sup>2</sup>                  |                |                      |                     |                 |
| Not DM, MetSyn or smoking and no CKD                     | 1417           | 97 (6.8%)            | 159 (11.2%)         | 208 (14.7%)     |
| DM, MetSyn or smoking only                               | 2256           | 212 (9.4%)           | 343 (15.2%)         | 450 (19.9%)     |
| CKD only                                                 | 70             | 12 (17.1%)           | 22 (31.4%)          | 28 (40.0%)      |
| Both DM, MetSyn or smoking and CKD                       | 195            | 31 (15.9%)           | 70 (35.9%)          | 83 (42.6%)      |

ACR albumin to creatinine ratio; eGFR, estimated glomerular filtration rate. \*Pooled outcome includes composite of recurrent CHD or all-cause mortality. Recurrent CHD events and all-cause mortality do not sum to the number of pooled outcome events as some participants had recurrent events and died.

**Supplementary Table IV.** Crude incidence rates (95% CI) of recurrent CHD events, all-cause mortality or the pooled outcome of CHD events or all-cause mortality per 1,000 person-years using alternate definitions of CKD

|                                                          | No CKD                    |                       | CKD                      |                       |
|----------------------------------------------------------|---------------------------|-----------------------|--------------------------|-----------------------|
|                                                          | Not DM, MetSyn or Smoking | DM, MetSyn or Smoking | No DM, MetSyn or Smoking | DM, MetSyn or Smoking |
| Recurrent CHD Events                                     |                           |                       |                          |                       |
| eGFR <60 mL/min per 1.73 m <sup>2</sup>                  | 14.5 (11.2-17.7)          | 21.7 (18.4-24.9)      | 33.8 (22.1-45.5)         | 36.4 (27.9-44.9)      |
| ACR ≥30 mg/g                                             | 14.3 (11.1-17.4)          | 20.3 (17.0-23.5)      | 38.8 (25.2-52.5)         | 37.0 (29.5-44.5)      |
| eGFR <60 mL/min per 1.73 m <sup>2</sup> and ACR ≥30 mg/g | 16.2 (13.0-19.4)          | 22.4 (18.2-26.6)      | 41.9 (18.2-65.6)         | 47.8 (32.8-62.8)      |
| eGFR <45 mL/min per 1.73 m <sup>2</sup>                  | 16.2 (13.0-19.4)          | 23.0 (19.9-26.1)      | 41.8 (18.2-65.5)         | 45.1 (29.2-61.0)      |
| All-cause mortality                                      |                           |                       |                          |                       |
| eGFR <60 mL/min per 1.73 m <sup>2</sup>                  | 22.6 (18.7-26.5)          | 29.6 (26.0-33.2)      | 50.0 (36.8-64.2)         | 72.5 (61.0-84.0)      |
| ACR ≥30 mg/g                                             | 22.5 (18.7-26.4)          | 28.5 (24.8-32.2)      | 55.3 (39.8-70.8)         | 65.1 (55.6-74.5)      |
| eGFR <60 mL/min per 1.73 m <sup>2</sup> and ACR ≥30 mg/g | 24.4 (20.6-28.2)          | 32.5 (29.0-36.0)      | 77.4 (46.4-108.4)        | 97.9 (77.5-118.4)     |
| eGFR <45 mL/min per 1.73 m <sup>2</sup>                  | 24.7 (20.9-28.6)          | 33.8 (30.2-37.4)      | 69.6 (40.5-98.6)         | 92.2 (70.6-113.8)     |
| Pooled outcome*                                          |                           |                       |                          |                       |
| eGFR <60 mL/min per 1.73 m <sup>2</sup>                  | 31.6 (26.8-36.3)          | 44.4 (39.8-49.1)      | 71.8 (54.7-88.9)         | 92.5 (78.9-106.1)     |
| ACR ≥30 mg/g                                             | 31.1 (26.4-35.7)          | 42.0 (37.4-46.7)      | 82.7 (62.8-102.7)        | 88.3 (76.7-99.9)      |
| eGFR <60 mL/min per 1.73 m <sup>2</sup> and ACR ≥30 mg/g | 34.6 (29.9-39.3)          | 47.3 (42.8-51.7)      | 101.2 (64.4-138.1)       | 126.1 (101.8-150.5)   |
| eGFR <45 mL/min per 1.73 m <sup>2</sup>                  | 34.8 (30.0-39.5)          | 48.8 (44.3-53.3)      | 97.6 (61.5-133.8)        | 120.7 (94.7-146.7)    |

Numbers in table are incidence rate (95% confidence interval) per 1,000 person-years. ACR, albumin to creatinine ratio; eGFR, estimated glomerular filtration rate.

\*Pooled outcome includes composite of recurrent CHD or all-cause mortality.
